# Supplementary material
Source: publisher site journal article supplement (https://www.dovepress.com/article/376408)
Supplement: Supplementary file 1 [file get_supplementary_file.php]

Abstract: 231 words

Full text: 3,043 words

Tables: 2

Figures: 3

Supplementary tables: 1

Supplementary figures: 2

**Alleviating excessive worries improves co-occurring depression and pain in adolescent and young adult cancer patients: a network approach**

Running head: anxiety, depression and pain in cancer patients

**Supplementary Table 1. Edge weight matrix**

|  | **Pain** | **PHQ1** | **PHQ2** | **PHQ3** | **PHQ4** | **PHQ5** | **PHQ6** | **PHQ7** | **PHQ8** | **PHQ9** | **GAD1** | **GAD2** | **GAD3** | **GAD4** | **GAD5** | **GAD6** | **GAD7** |
| --- | --- | --- | --- | --- | --- | --- | --- | --- | --- | --- | --- | --- | --- | --- | --- | --- | --- |
| **Pain** | 0 |  |  |  |  |  |  |  |  |  |  |  |  |  |  |  |  |
| **PHQ1** | 0 | 0 |  |  |  |  |  |  |  |  |  |  |  |  |  |  |  |
| **PHQ2** | 0 | 0.2671 | 0 |  |  |  |  |  |  |  |  |  |  |  |  |  |  |
| **PHQ3** | 0.0326 | 0.0338 | 0 | 0 |  |  |  |  |  |  |  |  |  |  |  |  |  |
| **PHQ4** | 0.0114 | 0.1678 | 0.0649 | 0.2466 | 0 |  |  |  |  |  |  |  |  |  |  |  |  |
| **PHQ5** | 0 | 0.1282 | 0.033 | 0 | 0.1901 | 0 |  |  |  |  |  |  |  |  |  |  |  |
| **PHQ6** | 0.0894 | 0 | 0.1789 | 0 | 0.0574 | 0 | 0 |  |  |  |  |  |  |  |  |  |  |
| **PHQ7** | 0 | 0.0789 | 0.0838 | 0.1005 | 0.0145 | 0 | 0 | 0 |  |  |  |  |  |  |  |  |  |
| **PHQ8** | 0.0452 | 0 | 0.125 | 0 | 0.1243 | 0.0113 | 0.1248 | 0.0228 | 0 |  |  |  |  |  |  |  |  |
| **PHQ9** | 0 | 0 | 0.0637 | 0.031 | 0 | 0 | 0.097 | 0.0699 | 0.167 | 0 |  |  |  |  |  |  |  |
| **GAD1** | 0.0123 | 0.0611 | 0.065 | 0 | 0 | 0.0112 | 0.0877 | 0 | 0.0172 | 0 | 0 |  |  |  |  |  |  |
| **GAD2** | 0 | 0.151 | 0.096 | 0.0768 | 0.0095 | 0.1548 | 0.0163 | 0 | 0.0521 | 0.0885 | 0.2676 | 0 |  |  |  |  |  |
| **GAD3** | 0 | 0 | 0 | 0 | 0.0142 | 0.0721 | 0.0021 | 0 | 0.0098 | 0.0156 | 0.0772 | 0.1227 | 0 |  |  |  |  |
| **GAD4** | 0 | 0 | 0 | 0 | 0 | 0.0791 | 0.0815 | 0 | 0 | 0.0912 | 0.125 | 0.0519 | 0.3031 | 0 |  |  |  |
| **GAD5** | 0.0576 | 0 | 0.0618 | 0 | 0 | 0.0128 | 0.0636 | 0.1784 | 0.0013 | 0.038 | 0.1449 | 0 | 0.0359 | 0.2623 | 0 |  |  |
| **GAD6** | 0 | 0 | 0.0337 | 0.0827 | 0.071 | 0.012 | 0.0074 | 0 | 0.1212 | 0 | 0.1241 | 0.0488 | 0.0971 | 0.188 | 0.0783 | 0 |  |
| **GAD7** | 0 | 0 | 0.0708 | 0.0346 | 0 | 0 | 0.1965 | 0.0175 | 0.0068 | 0.0563 | 0 | 0.0288 | 0.183 | 0 | 0.1144 | 0.1032 | 0 |
| Note: GAD: General Anxiety Disorder Questionnaire; PHQ: Patient Health Questionnaire; | | | | | | | | | | | | | | | | | |

**Supplementary Figure 1. Stability of centrality indices**


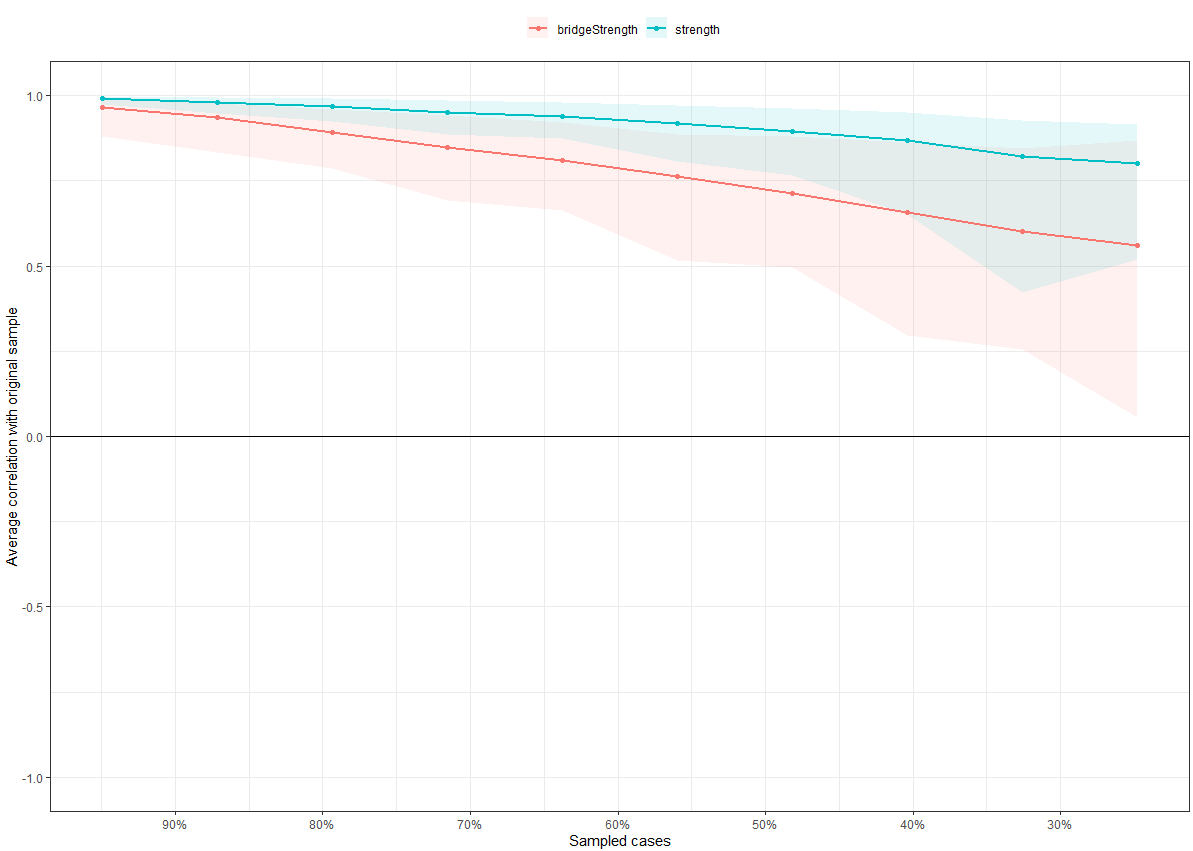


Note: The X-axis represents the proportion of sampled case at each step, while the Y-axis represents the mean correlations between the original indices and the subset indices. Colorful areas represent 95% CI.

**Supplementary Figure 2. Bootstrapped 95%CIs of estimated edge weights**


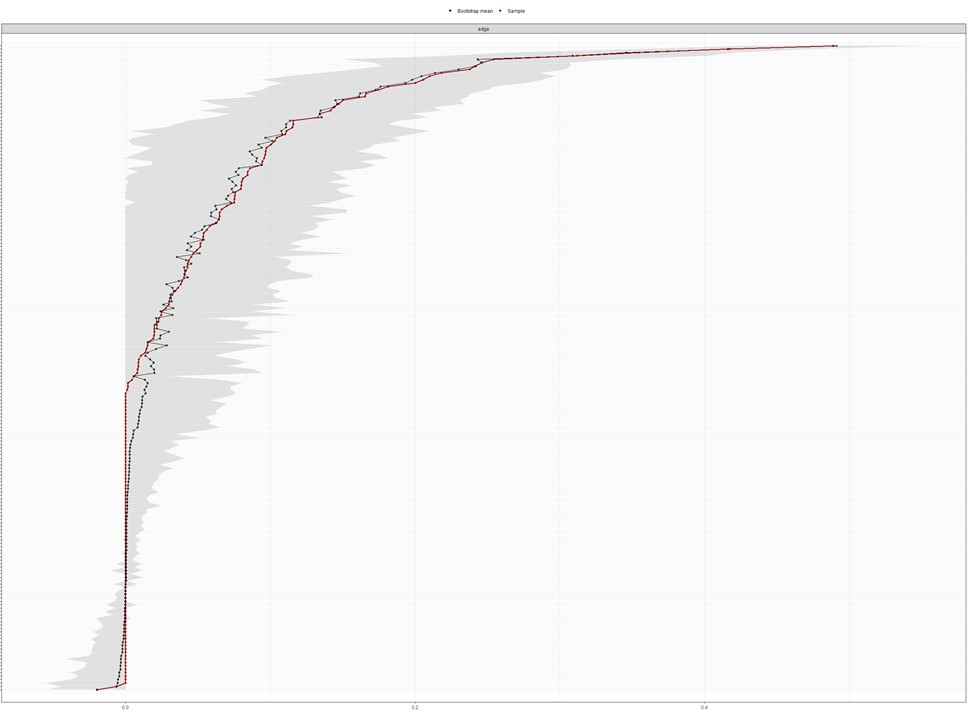


Note: The red dots indicate the values of each edge weight, ordered from the highest to the lowest edge-weight values. The gray area represents the 95% CIs of edge weights, estimated with the non-parametric bootstrap procedure. Wide intervals indicate lower stability and narrow intervals indicate higher stability.
